# Supplementary material
Source: publisher figshare collection journal article supplement (https://acs.figshare.com/ndownloader/files/3826231)
Supplement: Supplementary file 1 [file 3826231]

## Supporting Information

### A High-performance Hierarchical Graphene@Polyaniline@Graphene Sandwich Containing Hollow Structures for Supercapacitor Electrodes

Xianbin Liu, Na Wen, Xiaoli Wang, Yuying Zheng\*

*College of Materials Science and Engineering, Fuzhou University, 2 Xueyuan Road, Fuzhou  
350116, China*

\* Fax: (+86) 591 22866529.

E-mail: [yyzheng@fzu.edu.cn](mailto:yyzheng@fzu.edu.cn).

#### Supporting information S1:

The electrical conductivity of the obtained materials was measured by a four-probe method using compress pellets with a SDY-4 four-point probe meter (China). And the BET surface area was measured by nitrogen adsorption-desorption isotherm on a NOVA 2000e surface area and pore size analyzer (U.S.A.).

Table S1 Electrical conductivity and BET surface area of rGO, pure PANI, G@PANI and G@PANI@G.

| Materials | Electrical Conductivity (S cm <sup>-1</sup> ) | BET Surface Area (m <sup>2</sup> g <sup>-1</sup> ) |
|-----------|-----------------------------------------------|----------------------------------------------------|
| rGO       | 89.3                                          | 317.5                                              |
| Pure PANI | 8.4                                           | 108.6                                              |
| G@PANI    | 27.6                                          | 162.1                                              |
| G@PANI@G  | 39.1                                          | 241.3                                              |

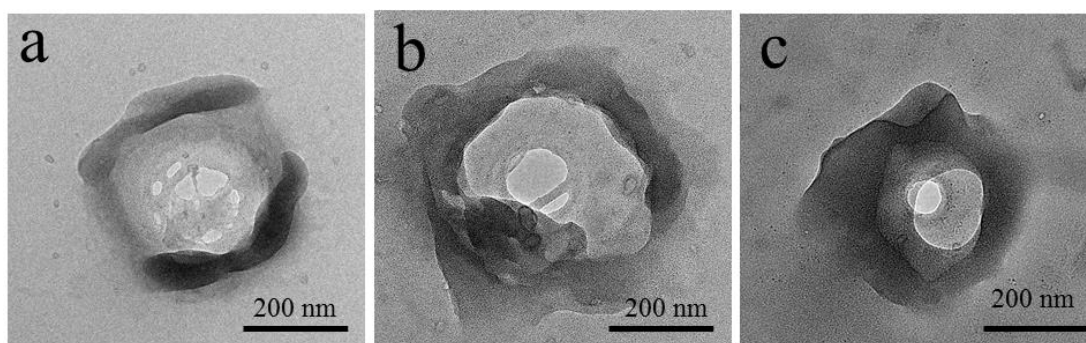

Figure S1 TEM images of G@PANI@G with different aniline concentrations: (a) 0.005 M; (b) 0.01 M and 0.02 M.

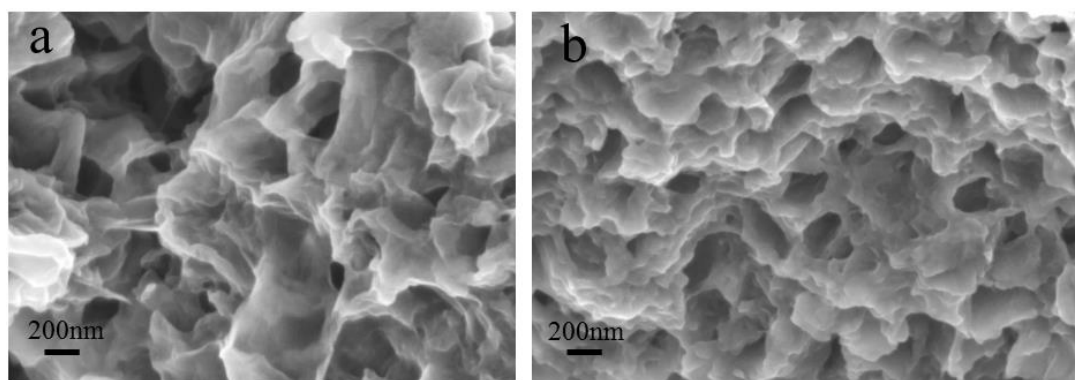

Figure S2 SEM images of G@PANI@G from SiO<sub>2</sub> spheres with different sizes: (a) 420 nm and (b) 100 nm.
